# Supplementary material for: Effect of Pd2Spermine on Mice Brain-Liver Axis Metabolism Assessed by NMR Metabolomics
Source: MDPI journal article supplement (doi:10.3390/ijms232213773), 2022-11-09
Supplement: s1 [file s1]

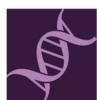

*Supplementary Materials*

## Effect of Pd<sub>2</sub>Spermine on Mice Brain-Liver Axis Metabolism Assessed by NMR Metabolomics

Tatiana J. Carneiro <sup>1</sup>, Martin Vojtek <sup>2</sup>, Salomé Gonçalves-Monteiro <sup>2</sup>,  
Ana L. M. Batista de Carvalho <sup>3</sup>, Maria Paula M. Marques <sup>3,4</sup>, Carmen Diniz <sup>2</sup> and Ana M. Gil <sup>1,\*</sup>

<sup>1</sup> Department of Chemistry and CICECO—Aveiro Institute of Materials, University of Aveiro, 3810-193 Aveiro, Portugal

<sup>2</sup> LAQV/REQUIMTE, Laboratory of Pharmacology, Department of Drug Sciences, Faculty of Pharmacy, University of Porto, 4150-755 Porto, Portugal

<sup>3</sup> Molecular Physical-Chemistry R&D Unit, Department of Chemistry, University of Coimbra, 3004-535 Coimbra, Portugal

<sup>4</sup> Department of Life Sciences, Faculty of Science and Technology, University of Coimbra, 3000-456 Coimbra, Portugal

\* Correspondence: agil@ua.pt; Tel.: +351-234370707

**Figure S1.** Average 500 MHz <sup>1</sup>H NMR spectra of lipophilic extracts of (a) brain, and (b) liver from the control (untreated) group of a CDX mouse model of TNBC.

**Figure S2.** Average 500 MHz <sup>1</sup>H NMR spectra of aqueous extracts of liver, from a CDX mouse model of TNBC, exposed to (a) vehicle solution (control group), (b) cDDP (2 mg/kg/day), and (c) Pd<sub>2</sub>Spm (5 mg/kg/day).

**Figure S3.** (a) Spectral expansions ( $\delta$  8.2–9.6 ppm) of <sup>1</sup>H NMR spectra of aqueous extracts of CDX mice brain of controls, cDDP- and Pd<sub>2</sub>Spm-treated mice and (b) NAD<sup>+</sup>/NADH ratios for the same three animal groups.

**Figure S4.** Pairwise score scatter plots of PCA and PLS-DA models for <sup>1</sup>H NMR spectra of (a) aqueous and (b) lipophilic extracts of liver of CDX mice.

**Table S1.** Statistically significant ( $|ES| > ES$  Error and  $p$ -value  $< 0.05$ ) metabolite variations observed in the polar metabolomes of CDX mice brain and liver, compared to controls.

**Table S2.** Statistically significant ( $|ES| > ES$  Error and  $p$ -value  $< 0.05$ ) metabolite variations observed in the lipophilic metabolomes of CDX mice brain and liver, compared to controls.

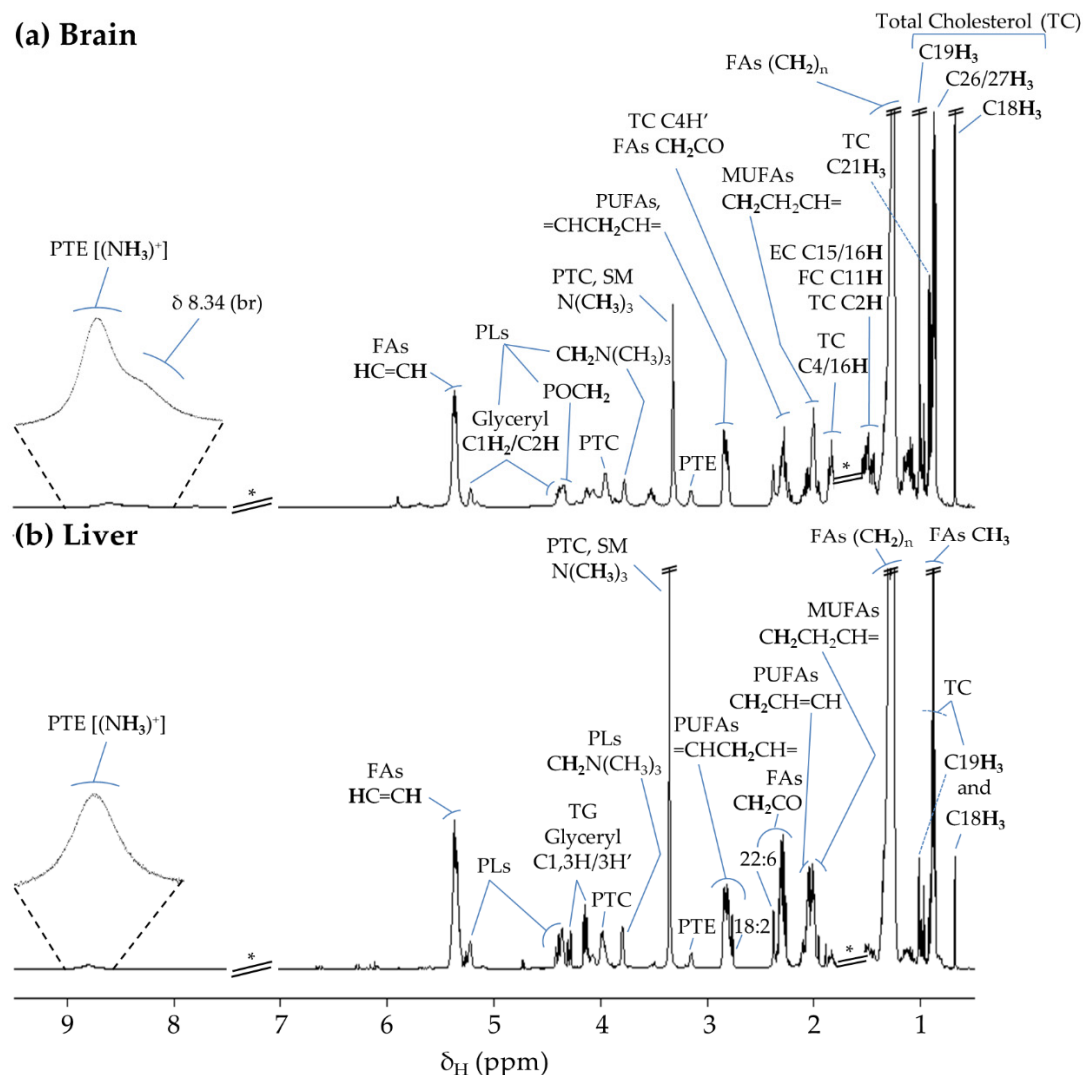

**Figure S1.** Average 500 MHz <sup>1</sup>H NMR spectra of lipophilic extracts of (a) brain, and (b) liver from the control (untreated) group of a CDX mouse model of TNBC. \* Cut-off of residual water signal ( $\delta$  1.5–1.8 ppm) and CDCl<sub>3</sub> and corresponding satellites ( $\delta$  7.0–7.5 ppm), not considered for multivariate analysis. Abbreviations: EC, esterified cholesterol; FAs, fatty acids; FC, free cholesterol; MUFAs, monounsaturated fatty acids; PLs, phospholipids; PTC, phosphatidylcholine; PTE, phosphatidylethanolamine; PUFAs, polyunsaturated fatty acids; SM, sphingomyelin; TC, total cholesterol; TG, triacylglycerols; br, broad signal.

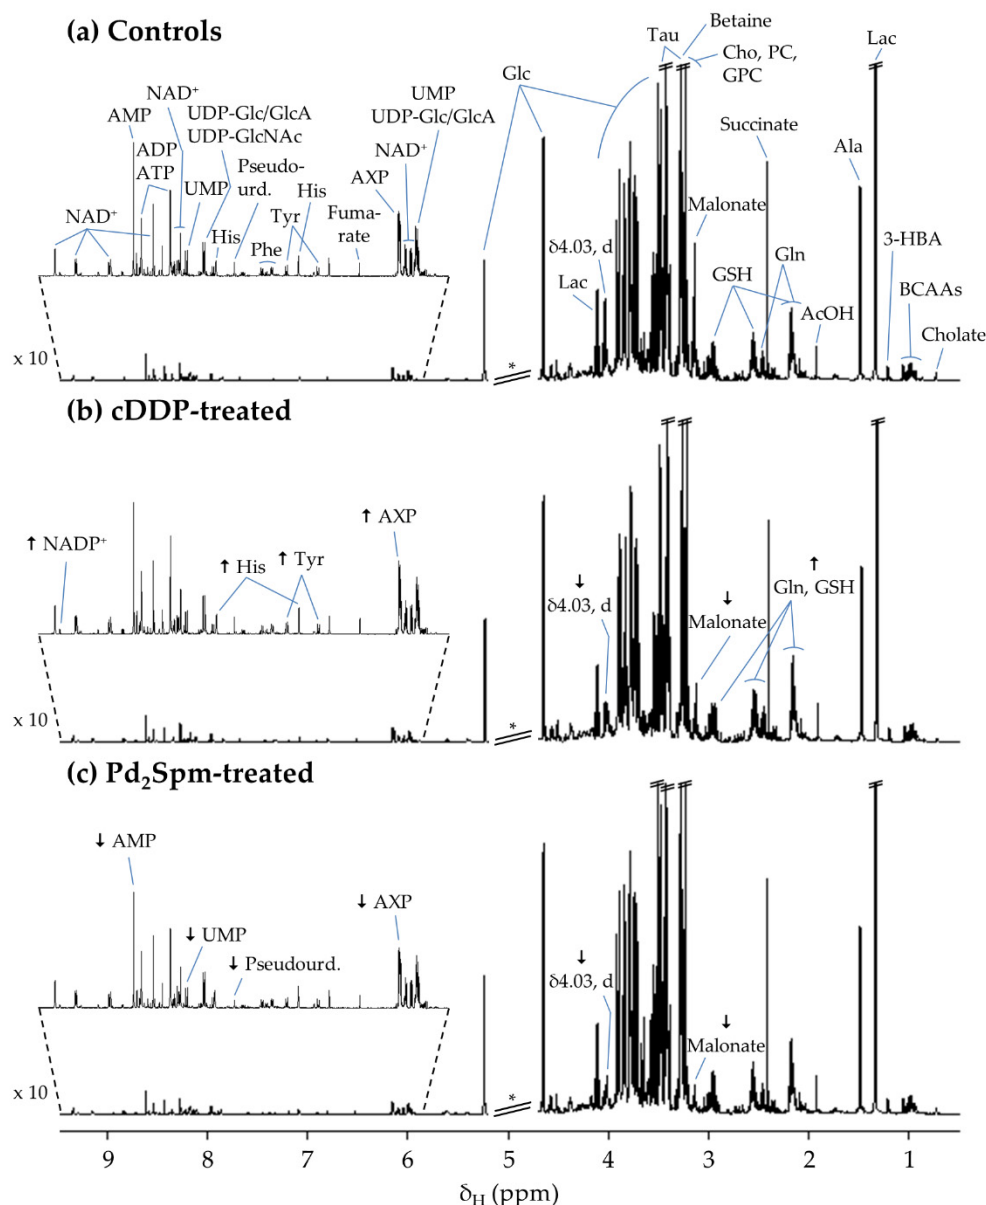

**Figure S2.** Average 500 MHz <sup>1</sup>H NMR spectra of aqueous extracts of liver, from a CDX mouse model of TNBC, exposed to (a) vehicle solution (control group), (b) cDDP (2 mg/kg/day), and (c) Pd<sub>2</sub>Spm (5 mg/kg/day). \* Cut-off of water suppression region (δ 4.6–5.1 ppm), not considered for multivariate analysis. The arrows in (b) and (c) identify visual metabolic variations found with qualitative inspection of spectra from each treated group compared to controls. Abbreviations: 3-letter code for amino acids; 3-HBA, 3-hydroxybutyrate; AcOH, acetate; ADP, adenosine diphosphate; AMP, adenosine monophosphate; ATP, adenosine triphosphate; AXP, adenosine nucleotides AMP, ADP and ATP; BCAAs, branched-chain amino acids (ile, leu and val); Cho, choline; Glc, glucose; GPC, glycerophosphocholine; GSH, glutathione (reduced); Lac, lactate; NAD<sup>+</sup>, nicotinamide adenine dinucleotide (oxidized); NADP<sup>+</sup>, nicotinamide adenine dinucleotide phosphate (oxidized); PC, phosphocholine; Pseudourid., pseudouridine (Ψ, tentative assignment); Tau, taurine; UDP-Glc/GlcA, uridine diphosphate glucose/glucuronate; UDP-GlcNAc, uridine diphosphate N-acetylglucosamine; UMP, uridine monophosphate; d, doublet.

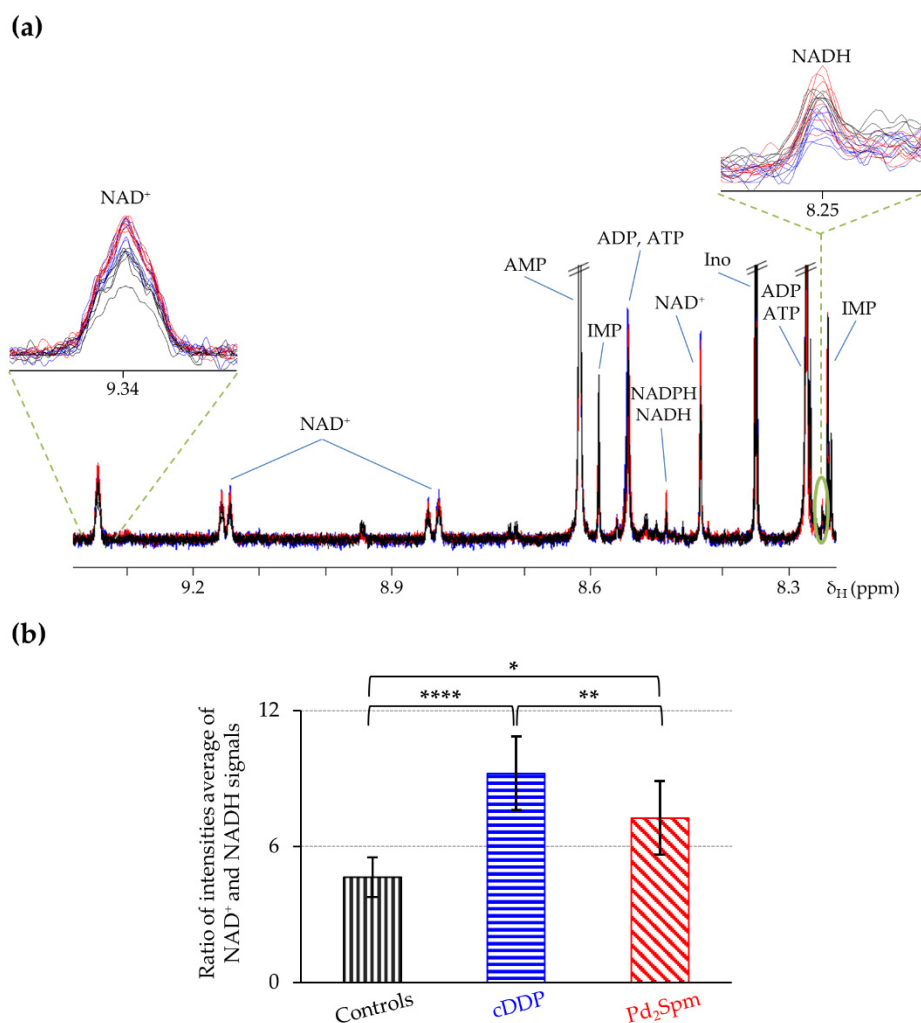

**Figure S3.** (a) Spectral expansions ( $\delta$  8.2–9.6 ppm) of the  $^1\text{H}$  NMR spectra of aqueous extracts of CDX mice brain of controls (black trace), cDDP- (blue trace) and Pd<sub>2</sub>Spm-treated (red trace) mice and (b) NAD<sup>+</sup>/NADH ratios for the same three animal groups; error bars indicate the respective standard deviation. \*  $p$ -value  $< 5.0 \times 10^{-2}$ ; \*\*  $p$ -value  $< 1.0 \times 10^{-2}$ ; \*\*\*\*  $p$ -value  $< 1.0 \times 10^{-4}$ .

**(a) Aqueous extracts**▲ Controls ( $n=6$ ); ◆ cDDP ( $n=8$ ); ● Pd<sub>2</sub>Spm ( $n=8$ )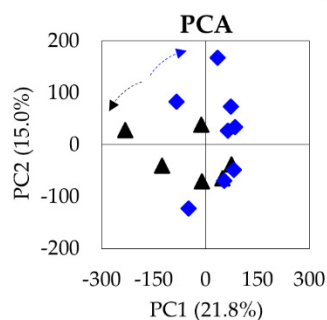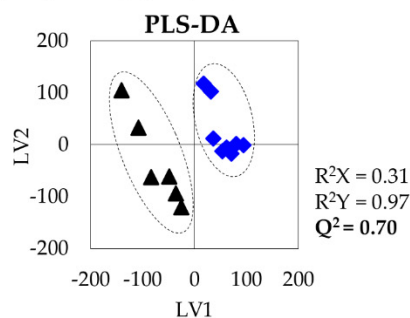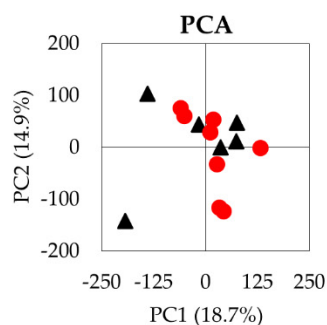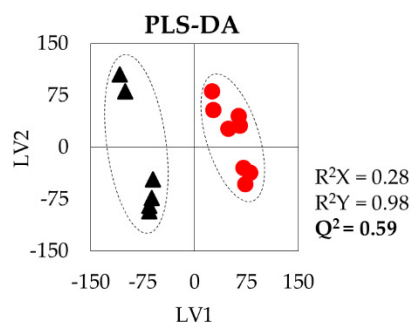**(b) Lipophilic extracts**▲ Controls ( $n=6$ ); ◆ cDDP ( $n=8$ ); ● Pd<sub>2</sub>Spm ( $n=8$ )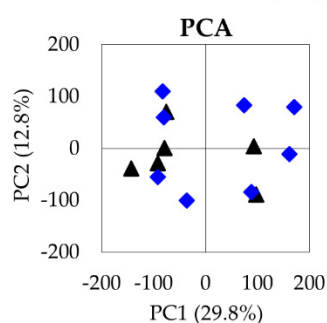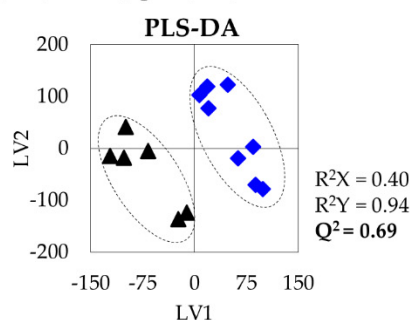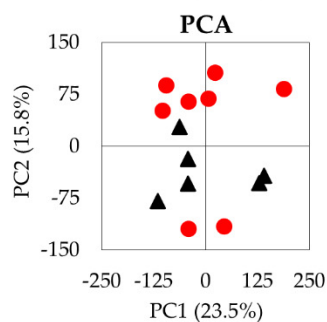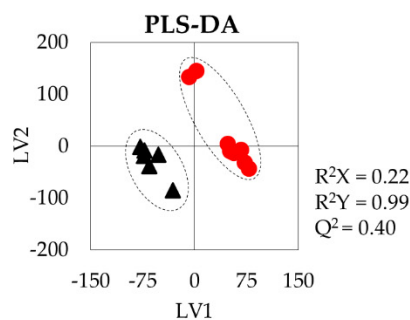

**Figure S4.** Pairwise score scatter plots of PCA and PLS-DA models for <sup>1</sup>H NMR spectra of (a) aqueous and (b) lipophilic extracts of liver of CDX mice (controls, black triangles,  $n = 6$ ; cDDP-treated, blue diamonds,  $n = 8$ ; Pd<sub>2</sub>Spm-treated, red circles,  $n = 8$ ). Validation parameters ( $R^2$  and  $Q^2$ ) are indicated for each PLS-DA model, with  $Q^2$  values > 0.5 highlighted in bold indicating robust classes separation.

**Table S1.** Statistically significant ( $|ES| > ES$  Error and  $p$ -value  $< 0.05$ ) metabolite variations observed in the polar metabolomes of CDX mice brain and liver, compared to controls. <sup>†</sup> Tentative assignment. <sup>‡</sup> Partial integration of resonance peak. <sup>a</sup> Metabolic variation statistically significant after False Discovery Rate (FDR) correction. Abbreviations: 3-letter code used for amino acids; 3-HIBA, 3-hydroxyisobutyrate; Ado, adenosine; AMP, adenosine monophosphate; Cho, choline; GPC, glycerophosphocholine; GSH, glutathione (reduced); IMP, inosine monophosphate; Ino, inosine; NAA, N-acetylaspartate; NAD<sup>+</sup>/NADH, nicotinamide adenine dinucleotide (oxidized/reduced); NADP<sup>+</sup>, nicotinamide adenine dinucleotide phosphate (oxidized); UDP-Glc/GlcA, uridine diphosphate glucose/glucuronate; UDP-GlcNAc, uridine diphosphate N-acetylglucosamine; UMP, uridine monophosphate; TMA, trimethylamine; s, singlet; d, doublet; dd, double doublet; t, triplet; m, multiplet.

|                            |                       | cDDP <i>vs.</i> Controls |                                     | PdSpm <i>vs.</i> Controls |                                     |
|----------------------------|-----------------------|--------------------------|-------------------------------------|---------------------------|-------------------------------------|
| Metabolite                 | δ/Multiplicity        | ES ± Error               | <i>p</i> -Value                     | ES ± Error                | <i>p</i> -Value                     |
| BRAIN                      |                       |                          |                                     |                           |                                     |
| 3-Aminoisobutyrate         | 1.18 (d)              | 1.3 ± 1.2                | 2.1 × 10 <sup>-2</sup> <sup>a</sup> | 3.5 ± 1.7                 | 5.9 × 10 <sup>-5</sup> <sup>a</sup> |
| 3-HIBA                     | 1.09 (d)              | -                        | -                                   | 4.1 ± 1.8                 | 2.1 × 10 <sup>-5</sup> <sup>a</sup> |
| Adenine                    | 8.23 (s)              | -                        | -                                   | -1.5 ± 1.2                | 3.2 × 10 <sup>-2</sup>              |
| Ado                        | 8.349 (s)             | -                        | -                                   | -1.9 ± 1.3                | 6.7 × 10 <sup>-4</sup> <sup>a</sup> |
| AMP                        | 8.60 (s)              | -                        | -                                   | -1.6 ± 1.2                | 1.3 × 10 <sup>-2</sup> <sup>a</sup> |
| Cholate <sup>†</sup>       | 0.73 (s)              | 1.2 ± 1.1                | 4.0 × 10 <sup>-2</sup>              | 4.7 ± 2.0                 | 3.2 × 10 <sup>-6</sup> <sup>a</sup> |
| Creatine                   | 3.04 (s)              | -                        | -                                   | -1.5 ± 1.2                | 1.3 × 10 <sup>-2</sup> <sup>a</sup> |
| Cystathionine <sup>†</sup> | 2.74 (d) <sup>‡</sup> | -                        | -                                   | 3.5 ± 1.7                 | 2.1 × 10 <sup>-5</sup> <sup>a</sup> |
| Glycerol                   | 3.55 (m)              | -1.7 ± 1.2               | 1.3 × 10 <sup>-3</sup> <sup>a</sup> | -                         | -                                   |
| GSH                        | 2.96 (m)              | 1.9 ± 1.3                | 4.1 × 10 <sup>-3</sup> <sup>a</sup> | 2.1 ± 1.3                 | 2.9 × 10 <sup>-3</sup> <sup>a</sup> |
| Ile                        | 0.94 (t)              | -                        | -                                   | 2.1 ± 1.3                 | 1.6 × 10 <sup>-3</sup> <sup>a</sup> |
| IMP                        | 8.23 (s)              | -                        | -                                   | 5.8 ± 2.4                 | 5.4 × 10 <sup>-6</sup> <sup>a</sup> |
| Ino                        | 8.35 (s)              | -                        | -                                   | 2.1 ± 1.3                 | 1.3 × 10 <sup>-3</sup> <sup>a</sup> |
| Leu                        | 0.96 (t)              | -                        | -                                   | 2.4 ± 1.4                 | 6.4 × 10 <sup>-4</sup> <sup>a</sup> |
| Lys                        | 1.73 (m)              | -                        | -                                   | 6.0 ± 2.5                 | 5.9 × 10 <sup>-8</sup> <sup>a</sup> |
| Malate <sup>†</sup>        | 2.66 (dd)             | -1.3 ± 1.2               | 2.3 × 10 <sup>-2</sup> <sup>a</sup> | -1.3 ± 1.2                | 2.5 × 10 <sup>-2</sup> <sup>a</sup> |
| NAA                        | 2.02 (s)              | -                        | -                                   | -1.4 ± 1.2                | 4.8 × 10 <sup>-2</sup>              |
| NAD <sup>+</sup>           | 9.34 (s)              | 2.1 ± 1.3                | 1.3 × 10 <sup>-3</sup> <sup>a</sup> | 3.6 ± 1.7                 | 6.7 × 10 <sup>-4</sup> <sup>a</sup> |
| NADH                       | 8.25 (s)              | -3.5 ± 1.7               | 1.9 × 10 <sup>-5</sup> <sup>a</sup> | -                         | -                                   |
| Pantothenate               | 0.74 (s)              | -                        | -                                   | 5.3 ± 2.2                 | 2.6 × 10 <sup>-7</sup> <sup>a</sup> |
| Phe                        | 7.33 (m)              | -                        | -                                   | 2.9 ± 1.5                 | 1.3 × 10 <sup>-4</sup> <sup>a</sup> |
| Pseudouridine <sup>†</sup> | 7.68 (s)              | -                        | -                                   | 1.3 ± 1.2                 | 2.1 × 10 <sup>-2</sup> <sup>a</sup> |
| Succinate                  | 2.41 (s)              | -                        | -                                   | -1.5 ± 1.2                | 1.2 × 10 <sup>-2</sup> <sup>a</sup> |
| UDP-Glc/GlcA               | 5.97 (m)              | -                        | -                                   | 1.6 ± 1.2                 | 7.8 × 10 <sup>-3</sup> <sup>a</sup> |
| UMP                        | 8.12 (d)              | -1.6 ± 1.2               | 6.9 × 10 <sup>-3</sup> <sup>a</sup> | -1.5 ± 1.2                | 9.9 × 10 <sup>-3</sup> <sup>a</sup> |
| Val                        | 1.05 (d)              | -                        | -                                   | 3.3 ± 1.6                 | 3.9 × 10 <sup>-5</sup> <sup>a</sup> |
| U1                         | 1.46 (d)              | 1.4 ± 1.2                | 1.4 × 10 <sup>-2</sup> <sup>a</sup> | 5.4 ± 2.3                 | 2.7 × 10 <sup>-7</sup> <sup>a</sup> |

|                                |                       |                |                        |                |                        |
|--------------------------------|-----------------------|----------------|------------------------|----------------|------------------------|
| U2                             | 2.87 (s)              | -              | -                      | $7.7 \pm 3.0$  | $4.3 \times 10^{-9}^a$ |
| U3                             | 2.98 (d)              | -              | -                      | $-1.9 \pm 1.3$ | $3.3 \times 10^{-3}^a$ |
| U4                             | 3.33 (s)              | -              | -                      | $-1.4 \pm 1.2$ | $2.0 \times 10^{-2}^a$ |
| <b>LIVER</b>                   |                       |                |                        |                |                        |
| O-Acetylcarnitine <sup>†</sup> | 3.18 (s)              | $-1.8 \pm 1.2$ | $4.8 \times 10^{-3}^a$ | $-4.0 \pm 1.8$ | $7.3 \times 10^{-6}^a$ |
| AMP                            | 8.60 (s)              | -              | -                      | $-2.2 \pm 1.3$ | $2.7 \times 10^{-3}^a$ |
| Ado                            | 6.08 (d)              | $-2.3 \pm 1.4$ | $1.4 \times 10^{-3}^a$ | $-3.1 \pm 1.6$ | $3.3 \times 10^{-4}^a$ |
| Cho                            | 3.20 (s)              | $-2.3 \pm 1.4$ | $8.7 \times 10^{-4}^a$ | $-3.8 \pm 1.8$ | $8.0 \times 10^{-6}^a$ |
| GPC                            | 3.23 (s)              | $-1.4 \pm 1.2$ | $1.8 \times 10^{-2}^a$ | -              | -                      |
| GSH                            | 2.17 (m)              | $1.9 \pm 1.3$  | $4.4 \times 10^{-3}^a$ | -              | -                      |
| His                            | 7.08 (s)              | $2.3 \pm 1.4$  | $7.9 \times 10^{-4}^a$ | -              | -                      |
| Malonate                       | 3.13 (s)              | $-1.9 \pm 1.3$ | $3.1 \times 10^{-3}^a$ | $-4.2 \pm 1.9$ | $6.7 \times 10^{-4}^a$ |
| NADP <sup>+</sup>              | 9.30 (s)              | $1.3 \pm 1.2$  | $2.5 \times 10^{-2}$   | -              | -                      |
| Pseudouridine <sup>†</sup>     | 7.68 (s)              | -              | -                      | $-1.8 \pm 1.3$ | $1.4 \times 10^{-2}^a$ |
| TMA                            | 2.89 (s)              | $1.8 \pm 1.3$  | $8.0 \times 10^{-3}^a$ | -              | -                      |
| Tyr                            | 6.90 (d)              | $1.2 \pm 1.2$  | $5.0 \times 10^{-2}$   | -              | -                      |
| UDP-GlcNAc                     | 5.52 (dd)             | $1.5 \pm 1.2$  | $3.2 \times 10^{-2}^a$ | -              | -                      |
| UMP                            | 8.12 (d)              | -              | -                      | $-1.6 \pm 1.2$ | $1.3 \times 10^{-2}^a$ |
| U5                             | 3.13 (s)              | $-1.7 \pm 1.2$ | $5.9 \times 10^{-3}^a$ | $-4.6 \pm 2.0$ | $5.1 \times 10^{-6}^a$ |
| U6                             | 3.33 (s) <sup>‡</sup> | $1.2 \pm 1.2$  | $3.2 \times 10^{-2}^a$ | -              | -                      |
| U7                             | 4.03 (d)              | $-1.6 \pm 1.2$ | $8.5 \times 10^{-3}^a$ | $-3.7 \pm 1.7$ | $3.4 \times 10^{-5}^a$ |

**Table S2.** Statistically significant ( $|ES| > ES$  Error and  $p$ -value  $< 0.05$ ) metabolite variations observed in the lipophilic metabolomes of CDX mice brain and liver, compared to controls. <sup>†</sup> Tentative assignment. <sup>‡</sup> Partial integration of resonance peak. <sup>a</sup> Metabolic variation statistically significant after False Discovery Rate (FDR) correction. Abbreviations: FAs, fatty acids; PLs, phospholipids; PTC, phosphatidylcholine; PTE, phosphatidylethanolamine; PUFAs, polyunsaturated fatty acids; TG, triacylglycerols; s, singlet; d, doublet; t, triplet; q, quartet; br, broad signal.

| Metabolite                     | $\delta$ /Multiplicity | cDDP <i>vs.</i> Controls |                                   | Pd2Spm <i>vs.</i> Controls |                                   |
|--------------------------------|------------------------|--------------------------|-----------------------------------|----------------------------|-----------------------------------|
|                                |                        | ES $\pm$ Error           | <i>p</i> -Value                   | ES $\pm$ Error             | <i>p</i> -Value                   |
| BRAIN                          |                        |                          |                                   |                            |                                   |
| Lathosterol C18H3 <sup>†</sup> | 0.54 (d)               | -                        | -                                 | -2.3 $\pm$ 1.4             | 1.4 $\times 10^{-2}$ <sup>a</sup> |
| FA (CH2) <sub>n</sub>          | 1.25 (br)              | -                        | -                                 | 3.2 $\pm$ 1.7              | 8.5 $\times 10^{-3}$ <sup>a</sup> |
| PUFAs ( $\omega$ 3) CH3        | 0.98 (t)               | -                        | -                                 | -2.2 $\pm$ 1.4             | 2.4 $\times 10^{-3}$ <sup>a</sup> |
| 18:2 =CHCH2CH=                 | 2.77 (t)               | -1.4 $\pm$ 1.2           | 4.6 $\times 10^{-2}$              | -3.0 $\pm$ 1.6             | 2.5 $\times 10^{-3}$ <sup>a</sup> |
| TG Glyceryl C2H <sup>†</sup>   | 5.29 (t)               | -                        | -                                 | -2.4 $\pm$ 1.4             | 1.1 $\times 10^{-2}$ <sup>a</sup> |
| PL CH2N(CH3)3                  | 3.75 (br)              | -                        | -                                 | 3.1 $\pm$ 1.6              | 7.1 $\times 10^{-3}$ <sup>a</sup> |
| PL <sup>†</sup>                | 8.36 (br)              | -                        | -                                 | 1.8 $\pm$ 1.3              | 3.1 $\times 10^{-3}$ <sup>a</sup> |
| PTC Glyceryl C3H2 <sup>†</sup> | 3.90 (br)              | -                        | -                                 | 2.1 $\pm$ 1.4              | 1.1 $\times 10^{-2}$ <sup>a</sup> |
| PTE (NH3) <sup>+</sup>         | 8.80 (br)              | -                        | -                                 | -2.3 $\pm$ 1.4             | 1.3 $\times 10^{-3}$ <sup>a</sup> |
| U1                             | 2.20 (q)               | -1.4 $\pm$ 1.2           | 4.4 $\times 10^{-2}$              | -1.9 $\pm$ 1.3             | 2.5 $\times 10^{-2}$ <sup>a</sup> |
| U2                             | 3.84 (d) <sup>‡</sup>  | -1.6 $\pm$ 2.3           | 1.3 $\times 10^{-2}$ <sup>a</sup> | -4.1 $\pm$ 1.9             | 1.6 $\times 10^{-4}$ <sup>a</sup> |
| LIVER                          |                        |                          |                                   |                            |                                   |
| PUFAs CH2CH=                   | 2.04 (q)               | -1.3 $\pm$ 1.2           | 2.9 $\times 10^{-2}$              | -                          | -                                 |
| PTE (NH3) <sup>+</sup>         | 8.80 (br)              | -1.7 $\pm$ 1.2           | 6.7 $\times 10^{-3}$ <sup>a</sup> | -                          | -                                 |
| U3                             | 1.015 (s)              | -                        | -                                 | -1.5 $\pm$ 1.2             | 3.1 $\times 10^{-2}$              |
| U4                             | 2.34 (br)              | -                        | -                                 | -1.3 $\pm$ 1.2             | 4.3 $\times 10^{-2}$              |
| U5                             | 3.64 (s)               | 1.5 $\pm$ 1.2            | 1.3 $\times 10^{-2}$              | -                          | -                                 |
| U6                             | 3.88 (s)               | -                        | -                                 | 2.0 $\pm$ 1.3              | 2.1 $\times 10^{-3}$ <sup>a</sup> |
